# Supplementary material for: Bacterial persistence induced by salicylate via reactive oxygen species
Source: PubMed Central journal article supplement (PMC5345018; doi:10.1038/srep43839), 2017-03-10
Supplement: srep43839-s1.pdf [file srep43839-s1.pdf]

## **SUPPLEMENTARY INFORMATION**

Bacterial persistence induced by salicylate via reactive oxygen species  
Tiebin Wang, Imane El Meouche, Mary J. Dunlop

## SUPPLEMENTARY METHODS

### Bacterial strains and growth conditions

#### *ΔmarRAB Δrob ΔsoxSR* strain

We generated a PCR fragment of the kanamycin resistant gene flanked by FRT regions from pKD13 with extensions homologous to the regions adjacent to the operon or gene <sup>1</sup>.

For deletion of the *marRAB* operon, we used the forward primer: **CCAGCGATCTGTTCAATGAAATTATCCATTGGGTCGCTTAATCCATATG**  
**GTGTAGGCTGGAGCTGCTTC**  
and the reverse primer:  
**AAGCCCCGAGATGTCGGGGCCAGAACAACACTACATAGCGTGTTGATTAT**  
**AATTCCGGGGATCCGTCGACC.**

For deletion of the *rob* gene, we used the forward primer:  
**CGACGGATCGGAATCAGCAGTTCACAGCGTAGATTAATTGGGCGATCTC**  
**CGTGTAGGCTGGAGCTGCTTC**  
and the reverse primer:  
**ATGGATCAGGCCGGCATTATTCGCGACCTTTTAATCTGGCTGGAAGGTC**  
**AATTCCGGGGATCCGTCGACC.**

For deletion of the *soxSR* genes, we used the forward primer:  
**AATTACAGGCGGTGGCGATAATCGCTGGGAGTGCGATCAAACCTGCCGAC**  
**GGTGTAGGCTGGAGCTGCTTC**  
and the reverse primer:  
**TGTTTATCTTCCAGCAAGCGTGCGCCGGTACCTTCTTCTCCTAAGCGGTC**  
**ATTCCGGGGATCCGTCGACC.**

Bold letters indicate the homologous recombination extensions. We then followed the protocol from <sup>1</sup> using the phage lambda recombinase harbored on the low copy plasmid pSIM6. After recombination, the resistance marker gene was removed using the pCP20 helper plasmid encoding the FLP recombinase.

#### MarA<sup>+</sup> strain

The transversion mutations were derived from <sup>2</sup>, where they are listed as “TV -14 to -18” and “TV +11 to 15.” To construct this strain we synthesized a DNA fragment containing a modified version of the *marRAB* promoter:

GCATCGCATTGAACAAAACCTTGAACCGATTTAGCAAAACGTGGCATCGGTCA  
ATTCATTCATTTGACTTATACTTGCCTGTT**ACCTATTATCCCCTGCAACTAATT**  
**ACGGTAAAGGGCAACTAATGTGAAAAGTACCAGCGATCTGTTCAATGAAATT**  
ATT.

Underlined letters indicate the MarR binding sites and bold letters indicate the transversion mutations. We introduced this modified promoter via homologous recombination following <sup>1</sup>, then cured the resistance marker. To accomplish this, we ligated the modified *marRAB* promoter given above to the kanamycin resistance gene

flanked by FRT regions from pKD13. The ligated fragment containing the kanamycin resistance gene followed by the modified *marRAB* promoter was then amplified using the forward primer:

**GGGGTAAACAAGGATAAAGTGTC**ACTCTTTAGCTAGCCTTGCATCGCAT  
TGTGTAGGCTGGAGCTGCTTC

and the reverse primer:

AATAATTT**CATTGAACAGATCGCTGGT**.

Bold letters indicate the homologous recombination extensions. We followed the protocol for recombination and curing of the kanamycin marker as described above.

## SUPPLEMENTARY FIGURES

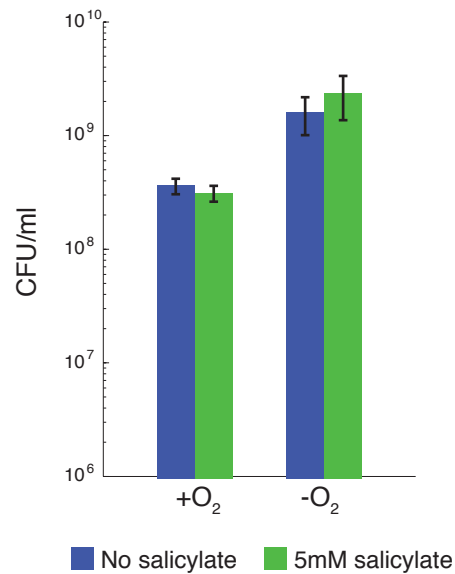

**Figure S1: Salicylate exposure does not affect initial cell counts before addition of antibiotics.**

Colony forming units per milliliter (CFU/ml) for cultures with and without 5 mM salicylate under aerobic conditions and anaerobic conditions before addition of antibiotics (t = 3 hours in aerobic conditions and t = 4 hours in anaerobic conditions). Error bars show standard errors from n = 12 biological replicates under aerobic conditions and from n = 6 biological replicates under anaerobic conditions.

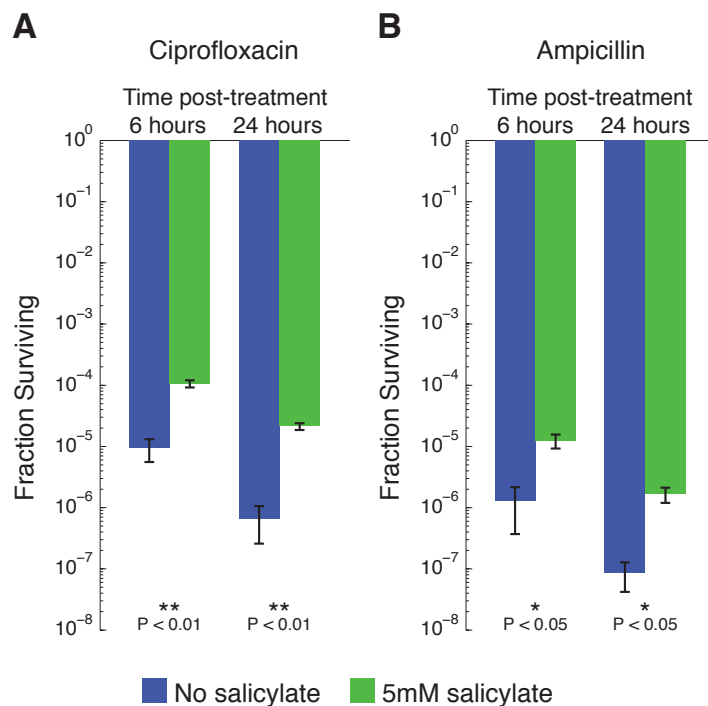

**Figure S2: Salicylate increases survival rate after 6 and 24 hours of ciprofloxacin or ampicillin treatment.**

Fraction of *E. coli* MG1655 surviving after 6 and 24 hours of (A) 5  $\mu\text{g/ml}$  ciprofloxacin or (B) 100  $\mu\text{g/ml}$  ampicillin treatment with and without 5 mM salicylate. Error bars show standard error of  $n = 3$  biological replicates. We used the Student's t-test to test for statistical significance.

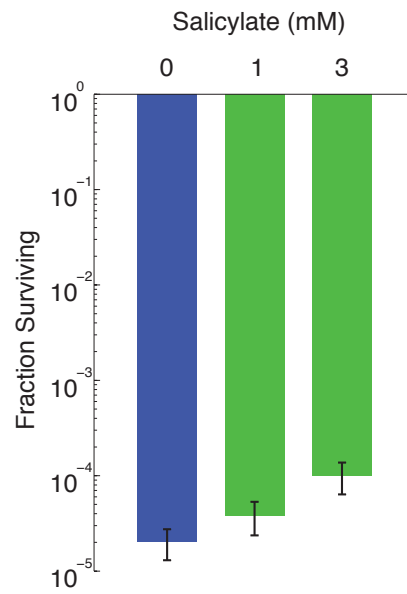

**Figure S3: 1 and 3 mM salicylate increase persister levels.**

Survival after 6 hours of 5  $\mu\text{g/ml}$  ciprofloxacin treatment with and without 1 or 3mM salicylate. Error bars show standard errors from n = 3 biological replicates.

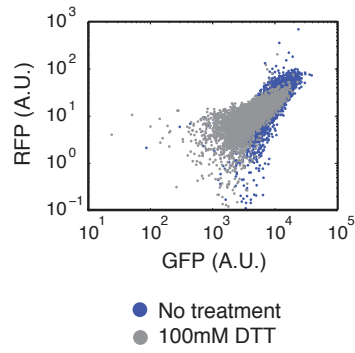

**Figure S4: Effect of DTT on membrane potential.**

Red vs. green fluorescence scatter plots showing individual cells treated with the membrane potential indicator DiOC2(3) with and without 100 mM DTT.

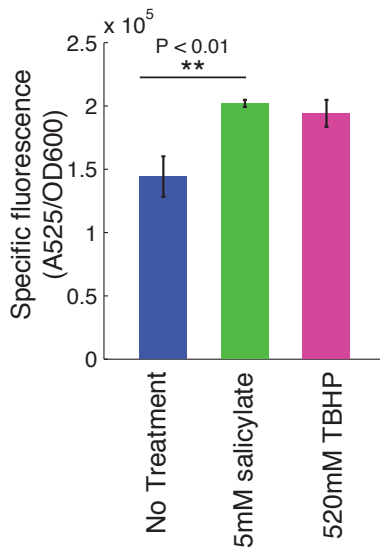

**Figure S5: Salicylate induces ROS in  $\Delta marRAB \Delta rob \Delta soxSR$  strain.**

Green fluorescence divided by  $OD_{600nm}$  for  $\Delta marRAB \Delta rob \Delta soxSR$  cultures treated with the general ROS indicator carboxy-H<sub>2</sub>DCFDA. TBHP is a positive control for ROS. Error bars show standard deviation from  $n = 3$  biological replicates. We used the Student's t-test to test for statistical significance.



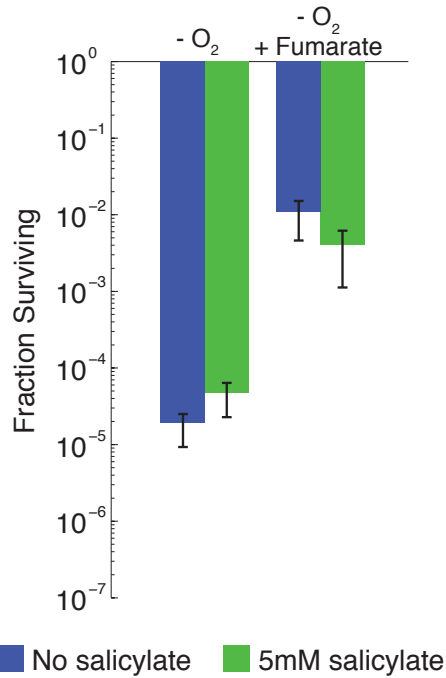

**Figure S6: Salicylate-induced persistence in ampicillin requires oxygen.**

Survival with and without 5 mM salicylate after 6 hours of 100  $\mu\text{g/ml}$  ampicillin treatment under anaerobic conditions with and without 40 mM fumarate. Error bars show standard errors from  $n = 3$  biological replicates.

## SUPPLEMENTARY REFERENCES

- 1 Datsenko, K. A. & Wanner, B. L. One-step inactivation of chromosomal genes in *Escherichia coli* K-12 using PCR products. *Proceedings of the National Academy of Sciences of the United States of America* **97**, 6640-6645, doi:10.1073/pnas.120163297 (2000).
- 2 Martin, R. G. & Rosner, J. L. Transcriptional and translational regulation of the *marRAB* multiple antibiotic resistance operon in *Escherichia coli*. *Molecular microbiology* **53**, 183-191, doi:10.1111/j.1365-2958.2004.04080.x (2004).
